# Supplementary material
Source: Springer Nature journal article supplement (https://www.springermedizin.de/resource/supplementary/12883_2009_292_MOESM1_ESM.pdf/9455044)
Supplement: MOESM1 [file 9455044]

**Wakefulness/Awareness**

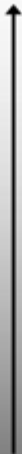

**Consciousness**

**Locked in Syndrome**

**Minimally Conscious State**

**Vegetative State**

**Coma**

**Brain Death**
